# Supplementary material for: TFH2 cells associate with enhanced humoral immunity to SARS‐CoV‐2 inactivated vaccine in patients with allergic rhinitis
Source: PubMed Central journal article supplement (PMC8792397; doi:10.1002/ctm2.717), 2022-01-26

# Figure S1

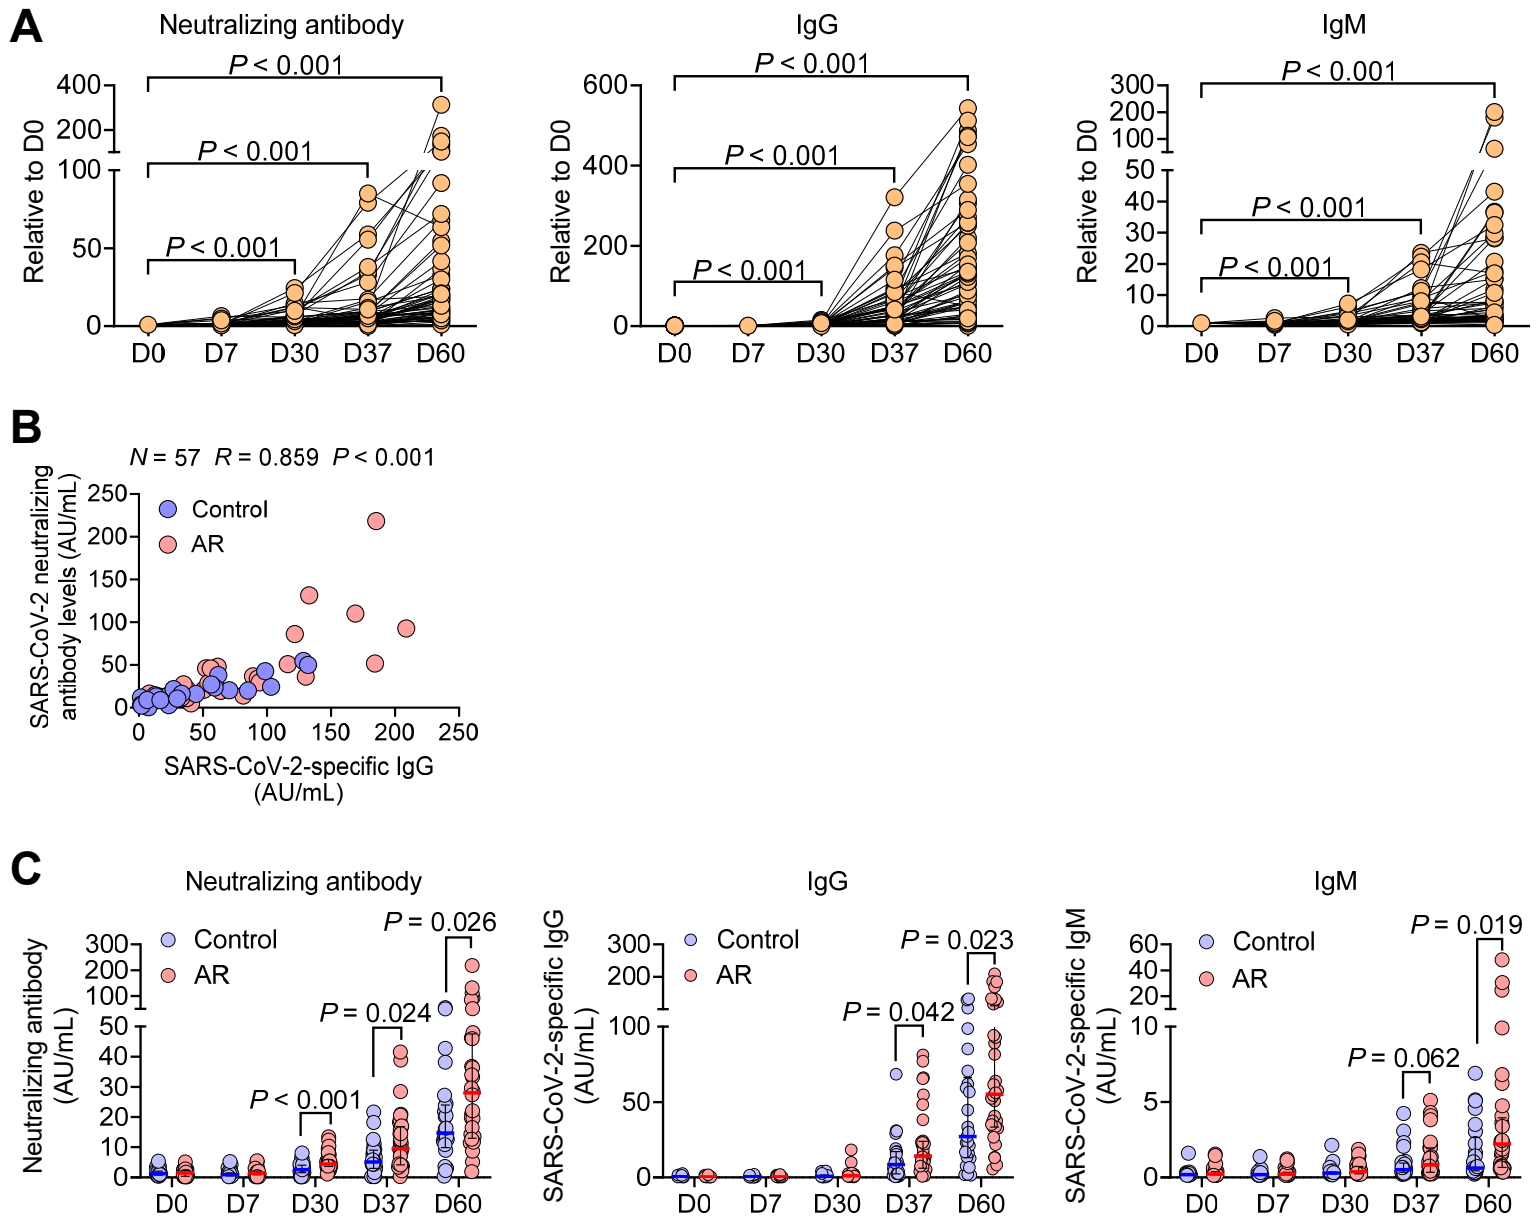

**Figure S2**

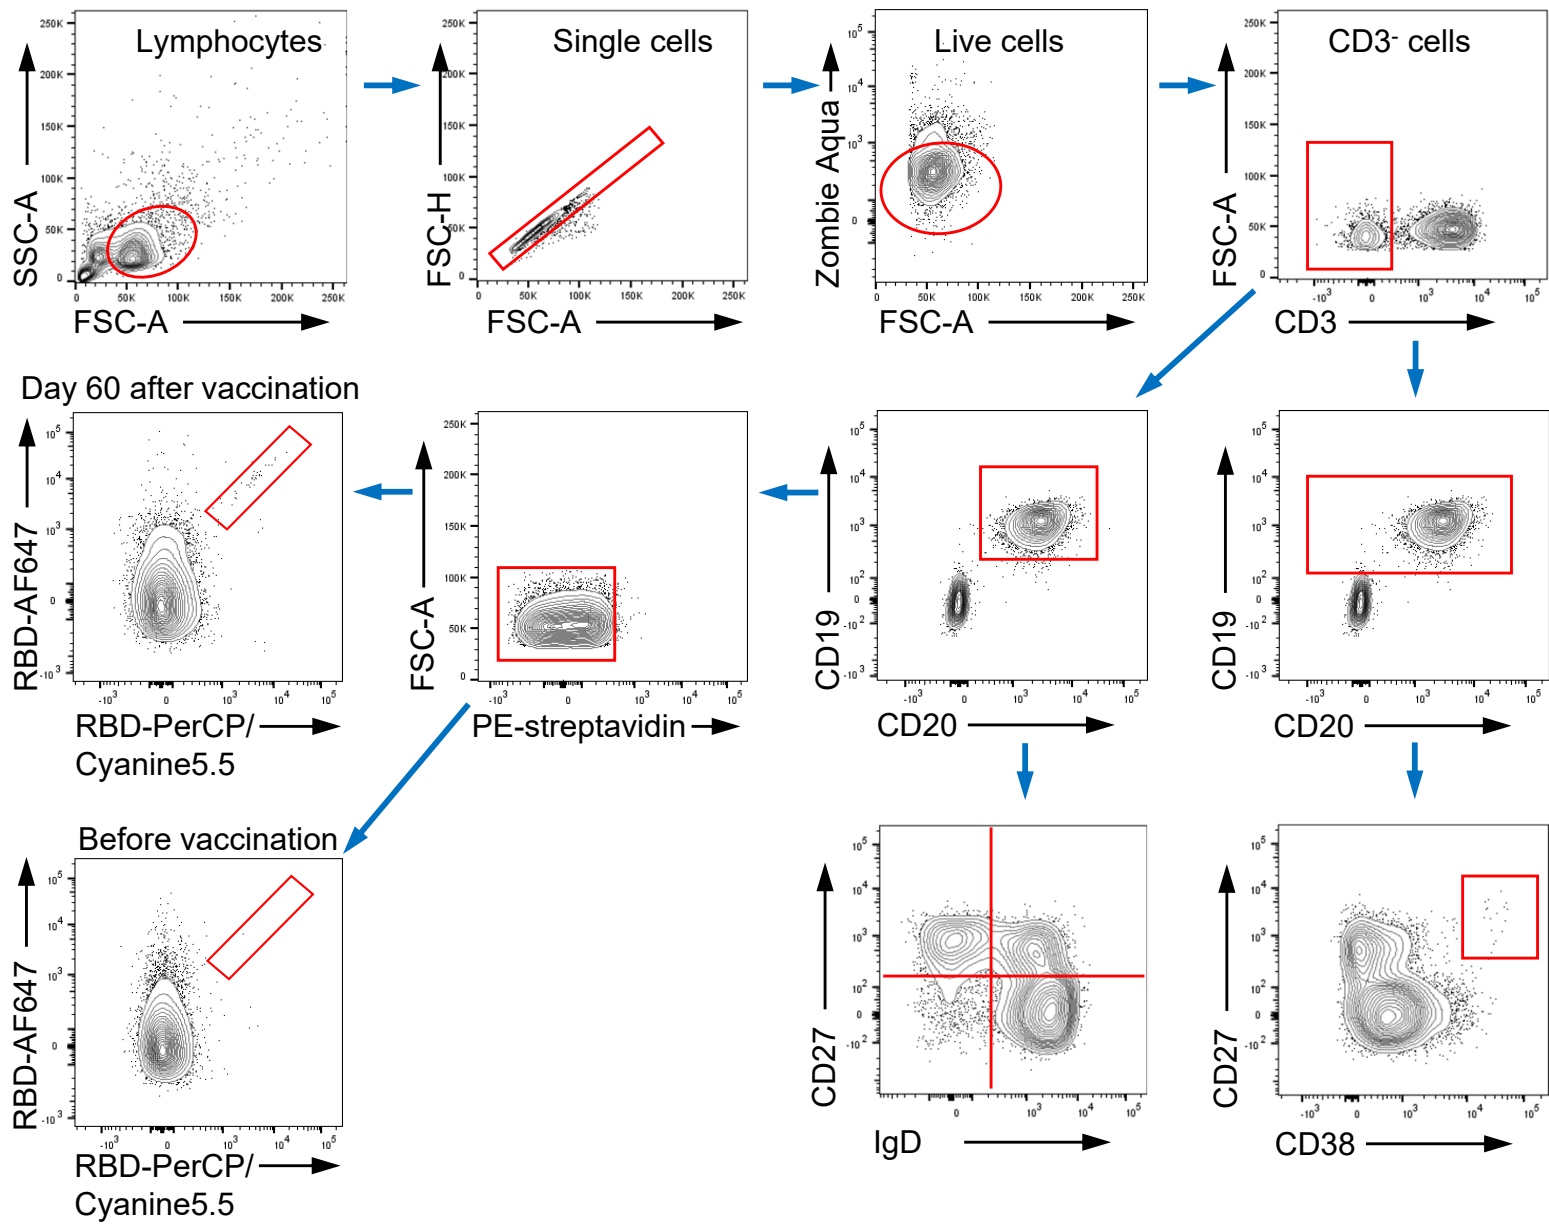

# Figure S3

## A

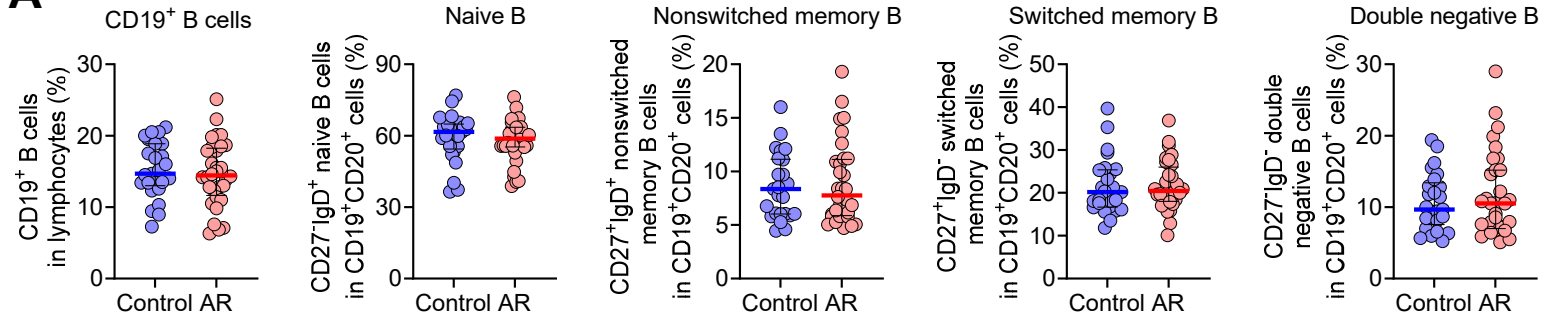

## B

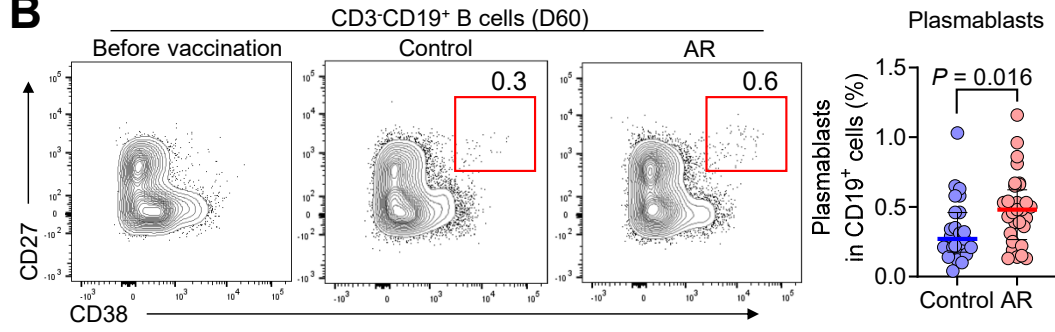



# Figure S5

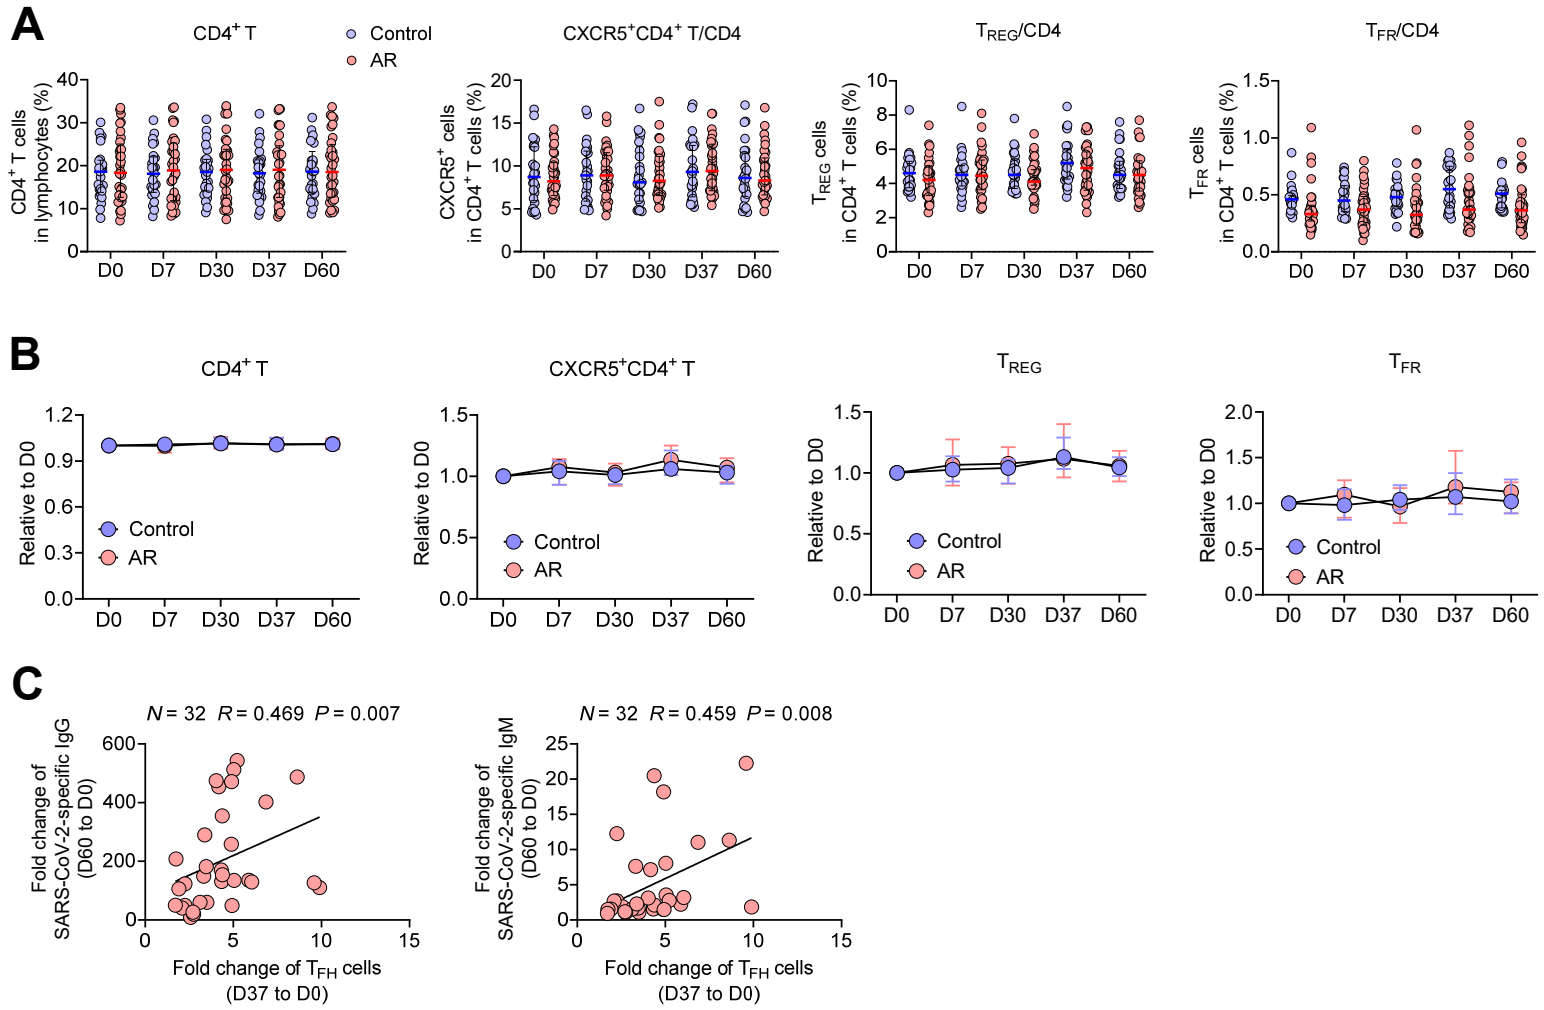

# Figure S6

**A**

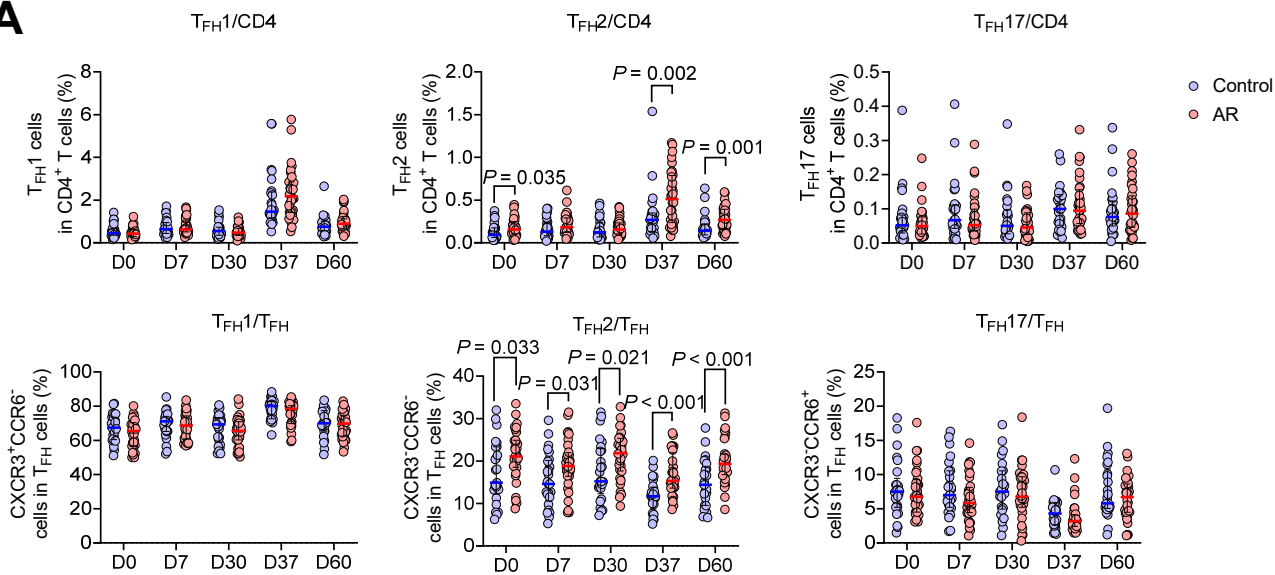

**B**

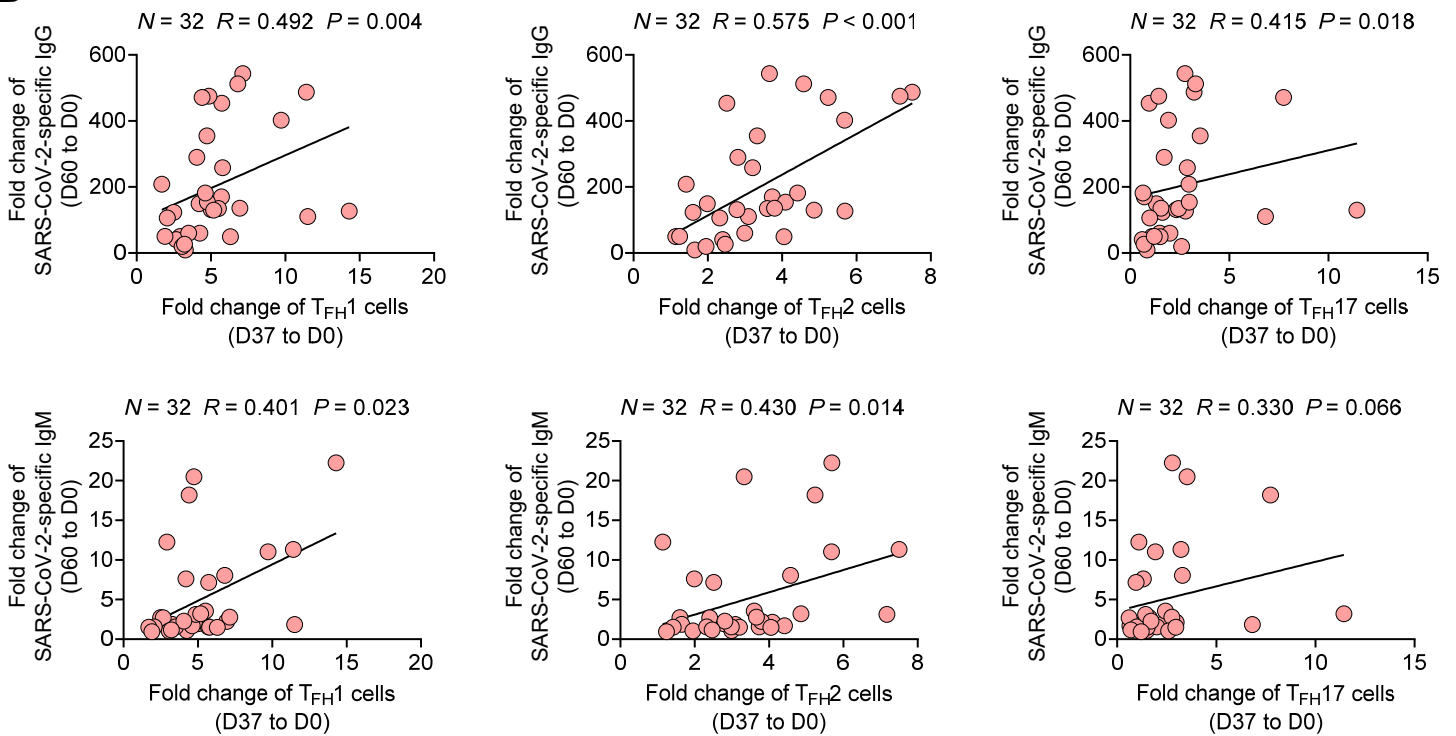

Supplement: CTM2-12-e717-s002.pdf [file CTM2-12-e717-s002.pdf]
